# Supplementary material for: Pharmacogenetics of Donepezil and Memantine in Healthy Subjects
Source: MDPI journal article supplement (doi:10.3390/jpm12050788), 2022-05-13
Supplement: s1 [file s1]

**Table S1.** Association between the polymorphism and Alzheimer's disease or drugs used for their treatment included in the present study.

| Gene    | Variant            | Name                                                 | Association with Alzheimer/Donepezil–<br>Memantine                                                                           | References |
|---------|--------------------|------------------------------------------------------|------------------------------------------------------------------------------------------------------------------------------|------------|
| ABCB1   | rs1128503 (C1236T) | ATP Binding Cassette<br>subfamily B member 1         | The ABCB1 C1236T, G2677T/A, and C3435T<br>SNPs influence BBB P-glycoprotein function.<br>ABCB1 is a transporter of donepezil | [8]        |
|         | rs1045642 (C3435T) |                                                      |                                                                                                                              |            |
|         | rs2032582 (G2677A) |                                                      |                                                                                                                              |            |
|         | rs2032582 (G2677T) |                                                      |                                                                                                                              |            |
|         | rs10248420         |                                                      |                                                                                                                              |            |
|         | rs10276036         |                                                      |                                                                                                                              |            |
|         | rs10280101         |                                                      |                                                                                                                              |            |
|         | rs11983225         |                                                      |                                                                                                                              |            |
|         | rs12720067         |                                                      |                                                                                                                              |            |
|         | rs3842             |                                                      |                                                                                                                              |            |
|         | rs4148737          |                                                      |                                                                                                                              |            |
|         | rs4728709          |                                                      |                                                                                                                              |            |
|         | rs7787082          |                                                      |                                                                                                                              |            |
| ADRA2A  | rs1800544          | Adrenoceptor alpha 2A                                | The mechanistic gene of anti-Parkinsonian drugs<br>such as apomorphine. It is also involved in AD                            | [56]       |
| APOC3   | rs4520             | Apolipoprotein C-III                                 |                                                                                                                              | [57]       |
|         | rs5128             |                                                      |                                                                                                                              |            |
| BDNF    | rs6265             | Brain-derived<br>neurotrophic factor                 | Memantine and donepezil induce BDNF<br>synthesis. BDNF is involved in AD                                                     | [48,53,54] |
| COMT    | rs13306278         | Catechol O-<br>methyltransferase                     | It is involved in AD pathology                                                                                               | [44]       |
|         | rs4680             |                                                      |                                                                                                                              |            |
| CYP1A2  | rs2470890 (*1B)    | Cytochrome P450<br>family 1 subfamily A<br>member 2  | Memantine is a weak inhibitor of CYP1A2. In<br>human liver microsomes, memantine does not<br>affect CYP1A2 activity          | [58]       |
|         | rs2069514 (*1C)    |                                                      |                                                                                                                              |            |
|         | rs762551 (*1F)     |                                                      |                                                                                                                              |            |
| CYP2A6  | rs28399433         | Cytochrome P450<br>family 2 subfamily A<br>member 6  | Memantine is a weak inhibitor of CYP2A6. In<br>human liver microsomes, memantine decreases<br>CYP2A6 activity                | [55]       |
| CYP2B6  | rs3211371 (*5)     | Cytochrome P450<br>family 2 subfamily B<br>member 6  | Memantine is a strong inhibitor of CYP2B6. In<br>human liver microsomes, memantine inhibits<br>CYP2B6 activity               | [55]       |
|         | rs3745274 (*9)     |                                                      |                                                                                                                              |            |
|         | rs2279343          |                                                      |                                                                                                                              |            |
|         | rs2279345          |                                                      |                                                                                                                              |            |
| CYP2C19 | rs4803419          | Cytochrome P450<br>family 2 subfamily C<br>member 19 | Memantine is a weak inhibitor of CYP2C19. In<br>human liver microsomes, memantine decreases<br>CYP2C19 activity              | [55]       |
|         | rs12248560 (*17)   |                                                      |                                                                                                                              |            |
|         | rs4244285 (*2)     |                                                      |                                                                                                                              |            |
|         | rs4986893 (*3)     |                                                      |                                                                                                                              |            |
| CYP2C8  | rs28399504 (*4)    | Cytochrome P450<br>family 2 subfamily C<br>member 8  | The substrate of selegiline, an anti-Parkinsonian<br>drug                                                                    |            |
|         | rs11572103 (*2)    |                                                      |                                                                                                                              |            |
|         | rs10509681 (*3)    |                                                      |                                                                                                                              |            |
|         | rs1058930 (*4)     |                                                      |                                                                                                                              |            |
| CYP2C9  | rs1799853 (*2)     | Cytochrome P450<br>family 2 subfamily C<br>member 9  | Donepezil is a substrate of CYP2C9                                                                                           | [59]       |
|         | rs1057910 (*3)     |                                                      |                                                                                                                              |            |
| Gene    | Variant            | Name                                                 | Association with Alzheimer/Donepezil–<br>Memantine                                                                           | References |
| CYP2D6  | rs1065852 (*10)    | Cytochrome P450<br>family 2 subfamily D<br>member 6  | Donepezil is a substrate of CYP2D6. There is a<br>drug label for donepezil dose adjustment based<br>on CYP2D6 genotype       | [8]        |
|         | rs5030865 (*14)    |                                                      |                                                                                                                              |            |
|         | rs28371706 (*17)   |                                                      |                                                                                                                              |            |
|         | rs35742686 (*3)    |                                                      |                                                                                                                              |            |
|         | rs3892097 (*4)     |                                                      |                                                                                                                              |            |

|               |                                                       |                                                                                                    |                                                                                                                                                                      |      |
|---------------|-------------------------------------------------------|----------------------------------------------------------------------------------------------------|----------------------------------------------------------------------------------------------------------------------------------------------------------------------|------|
|               | rs28371725 (*41)                                      |                                                                                                    |                                                                                                                                                                      |      |
|               | rs5030655 (*6)                                        |                                                                                                    |                                                                                                                                                                      |      |
|               | rs5030867 (*7)                                        |                                                                                                    |                                                                                                                                                                      |      |
|               | rs5030865 (*8)                                        |                                                                                                    |                                                                                                                                                                      |      |
|               | rs5030656 (*9)                                        |                                                                                                    |                                                                                                                                                                      |      |
| <i>CYP3A4</i> | rs55785340 (*2)<br>rs35599367 (*22)<br>rs4646438 (*6) | Cytochrome P450<br>family 3 subfamily A<br>member 4                                                | Memantine is a weak inhibitor of CYP3A4. In human liver microsomes, memantine does not affect CYP3A4 activity. In addition, CYP3A4 is a major substrate of donepezil | [8]  |
| <i>CYP3A5</i> | rs776746 (*3)<br>rs10264272 (*6)                      | Cytochrome P450<br>family 3 subfamily A<br>member 5                                                | The substrate of anti-Parkinsonian drugs such as levodopa                                                                                                            | [8]  |
| <i>CYP4F2</i> | rs2108622                                             | Cytochrome P450.<br>family 4. subfamily F.<br>polypeptide 2                                        | The hepatic CYP450 enzyme system does not majorly contribute to the metabolism of this drug                                                                          |      |
| <i>DRD2</i>   | rs1799732<br>rs1800497<br>rs6277                      | dopamine receptor D2                                                                               | Target of memantine                                                                                                                                                  | [52] |
| <i>DRD3</i>   | rs6280                                                | dopamine receptor D3                                                                               | Target of memantine                                                                                                                                                  | [60] |
| <i>EPHX1</i>  | rs1051740<br>rs2234922                                | Epoxide hydrolase 1.<br>microsomal (xenobiotic)                                                    | Show differential expression in AD                                                                                                                                   | [61] |
| <i>HTR2A</i>  | rs6313<br>rs6314<br>rs7997012                         | serotonin receptor                                                                                 | HTR2A is a target for donepezil                                                                                                                                      | [62] |
| <i>HTR2C</i>  | rs1414334<br>rs3813929<br>rs518147                    |                                                                                                    | HTR2C is mildly involved in AD                                                                                                                                       |      |
| <i>PTGS2</i>  | rs20417                                               | Prostaglandin-<br>endoperoxide synthase<br>2 (prostaglandin G/H<br>synthase and<br>cyclooxygenase) | Associated with AD risk                                                                                                                                              | [50] |
